# Supplementary material for: Transcriptome profiling in fast versus slow-growing rainbow trout across seasonal gradients
Source: BMC Genomics. 2016 Jan 15;17:60. doi: 10.1186/s12864-016-2363-5 (PMC4714434; doi:10.1186/s12864-016-2363-5)
Supplement: Additional file 7: — Shared contigs between size and season groups. (XLSX 27 kb) [file 12864_2016_2363_MOESM7_ESM.xlsx]

## Sheet: shared-Large&December
BX081120
BX081482
BX082988
BX084799
BX084800
BX085384
BX085781
BX086201
BX298166
BX299491
BX299492
BX301824
BX301861
BX301862
BX301890
BX302277
BX302479
BX303009
BX303010
BX304432
BX306327
BX307086
BX310067
BX310287
BX310507
BX311347
BX311486
BX311487
BX314388
BX317287
BX317429
BX317589
BX318589
BX319365
BX320299
BX859722
BX865302
BX865477
BX865482
BX865929
BX868563
BX870480
BX871996
BX873466
BX874309
BX879181
BX879908
BX909307
BX912807
CA344924
CA348094
CA350035
CA358950
CA359861
CA362258
CA363401
CA364497
CA366741
CA369711
CA370104
CA377679
CA378742
CA386348
CB492242
CB496409
CD810930
CN211171
CR363662
CT568926
CT568989
CT569027
CT569028
CT569042
CT569100
CT569205
CT569218
CT569318
CT569340
CT569345
CT569359
CT569368
CT569422
CT569455
CT569487
CT569538
CT569541
CT569566
CT569619
CT569705
CT569712
CT569748
CT569838
CT569917
CT570033
CT570055
CT570113
CT570135
CT570194
CT570229
CT570244
CT570348
CT570387
CT570409
CT570411
CT570432
CT570435
CT570599
CT570628
CT570640
CT570643
CT570685
CT570694
CT570722
CT570726
CT570743
CT570793
CT570843
CT570856
CT570897
CT570937
CT570955
CT571006
CT571125
CT571147
CT571165
CT571174
CT571220
CU064171
CU065770
CU068369
CU075944
CX031863
CX036188
CX040396
CX143770
DV198552
DV198825
DV199575
DV200297
DV200533
FP319931
FP320484
FP321126
FP321627
FP322345
FP324015
FP324893
GSONMT00000260001
GSONMT00000435001
GSONMT00000536001
GSONMT00000976001
GSONMT00003591001
GSONMT00004195001
GSONMT00004587001
GSONMT00004624001
GSONMT00004939001
GSONMT00005849001
GSONMT00007574001
GSONMT00007962001
GSONMT00008043001
GSONMT00008656001
GSONMT00008756001
GSONMT00009227001
GSONMT00009585001
GSONMT00009589001
GSONMT00009768001
GSONMT00010628001
GSONMT00011170001
GSONMT00011613001
GSONMT00011754001
GSONMT00012438001
GSONMT00012455001
GSONMT00012775001
GSONMT00013171001
GSONMT00013197001
GSONMT00014510001
GSONMT00015190001
GSONMT00015704001
GSONMT00016296001
GSONMT00016404001
GSONMT00016562001
GSONMT00016898001
GSONMT00016899001
GSONMT00016900001
GSONMT00016980001
GSONMT00017014001
GSONMT00018066001
GSONMT00019805001
GSONMT00019939001
GSONMT00023146001
GSONMT00023475001
GSONMT00023516001
GSONMT00024216001
GSONMT00025224001
GSONMT00025781001
GSONMT00025898001
GSONMT00026562001
GSONMT00026742001
GSONMT00027042001
GSONMT00027870001
GSONMT00028653001
GSONMT00030792001
GSONMT00030855001
GSONMT00030907001
GSONMT00031199001
GSONMT00031281001
GSONMT00031282001
GSONMT00032476001
GSONMT00032562001
GSONMT00033208001
GSONMT00033312001
GSONMT00033825001
GSONMT00034096001
GSONMT00034115001
GSONMT00034307001
GSONMT00034361001
GSONMT00035803001
GSONMT00036102001
GSONMT00036687001
GSONMT00038194001
GSONMT00038825001
GSONMT00039290001
GSONMT00039304001
GSONMT00039691001
GSONMT00040319001
GSONMT00040586001
GSONMT00040824001
GSONMT00043637001
GSONMT00044124001
GSONMT00045295001
GSONMT00046561001
GSONMT00047589001
GSONMT00048131001
GSONMT00048550001
GSONMT00049150001
GSONMT00050270001
GSONMT00051864001
GSONMT00052814001
GSONMT00053466001
GSONMT00053786001
GSONMT00054446001
GSONMT00055642001
GSONMT00056501001
GSONMT00057422001
GSONMT00059978001
GSONMT00062208001
GSONMT00062289001
GSONMT00062364001
GSONMT00062630001
GSONMT00062661001
GSONMT00063008001
GSONMT00064157001
GSONMT00064821001
GSONMT00065419001
GSONMT00065462001
GSONMT00065897001
GSONMT00067189001
GSONMT00067246001
GSONMT00067265001
GSONMT00068679001
GSONMT00069404001
GSONMT00069449001
GSONMT00070484001
GSONMT00070684001
GSONMT00071374001
GSONMT00072190001
GSONMT00072651001
GSONMT00072670001
GSONMT00073107001
GSONMT00073215001
GSONMT00073272001
GSONMT00073606001
GSONMT00073841001
GSONMT00074687001
GSONMT00074714001
GSONMT00075456001
GSONMT00075529001
GSONMT00075887001
GSONMT00076212001
GSONMT00077369001
GSONMT00077680001
GSONMT00078436001
GSONMT00078591001
GSONMT00079925001
GSONMT00080439001
GSONMT00081035001
GSONMT00081507001
GSONMT00081666001
GSONMT00081765001
GSONMT00081984001
GSONMT00082167001
GSONMT00082448001
NODE_10997_length_512_cov_3.917969
NODE_15038_length_771_cov_2.128405
NODE_25646_length_199_cov_2.190955
NODE_32054_length_805_cov_1.402484
NODE_34612_length_386_cov_3.753886
NODE_36838_length_597_cov_2.149079
NODE_37238_length_230_cov_2.595652
NODE_37770_length_483_cov_2.037267
NODE_37798_length_336_cov_2.244048
NODE_40483_length_398_cov_1.092965
NODE_42638_length_303_cov_1.795380
NODE_42895_length_667_cov_1.707646
NODE_45714_length_229_cov_1.724891
NODE_46442_length_331_cov_1.447130
NODE_48331_length_290_cov_1.875862
NODE_52071_length_343_cov_1.113703
NODE_52808_length_275_cov_1.000000
NODE_55580_length_390_cov_1.117949
NODE_56295_length_291_cov_1.130584
NODE_56895_length_246_cov_0.995935
NODE_58558_length_385_cov_0.901299
NODE_64156_length_452_cov_0.767699
NODE_64179_length_250_cov_0.000000
NODE_65207_length_322_cov_0.996894
SRR020739-11733
SRR020739-12640
SRR020739-13995
SRR020739-14850
SRR020739-154
SRR020739-1572
SRR020739-17473
SRR020739-21906
SRR020739-23854
SRR020739-27356
SRR020739-28871
SRR020739-3171
SRR020739-31916
SRR020739-33749
SRR020739-34144
SRR020739-36038
SRR020739-3831
SRR020739-40
SRR020739-4237
SRR020739-4451
SRR020739-4511
SRR020739-608
SRR020739-6306
SRR020739-7517
SRR020739-7524
SRR020739-9442
SRR020739-9568
SRR020739-9744
SRR020740-1065
SRR020740-11856
SRR020740-12211
SRR020740-12581
SRR020740-1521
SRR020740-16019
SRR020740-16169
SRR020740-17108
SRR020740-17322
SRR020740-17525
SRR020740-2071
SRR020740-2095
SRR020740-21511
SRR020740-23344
SRR020740-257
SRR020740-333
SRR020740-3887
SRR020740-5970
SRR020740-6038
SRR020740-6433
SRR020740-7486
SRR020740-9796
TC172647
TC172690
TC172882
TC172889
TC172912
TC172921
TC173123
TC173477
TC173543
TC174077
TC174285
TC174466
TC174624
TC174844
TC175045
TC175065
TC175180
TC175965
TC176437
TC176531
TC178119
TC178350
TC178473
TC178520
TC178761
TC179730
TC180904
TC181387
TC181601
TC181637
TC181716
TC181888
TC182221
TC182241
TC182486
TC182610
TC182788
TC182937
TC183477
TC183563
TC183672
TC184571
TC184848
TC185104
TC185828
TC185832
TC186094
TC186369
TC186497
TC187124
TC187920
TC187943
TC187953
TC188210
TC188954
TC189033
TC189040
TC189602
TC189823
TC189967
TC190087
TC190436
TC190631
TC191044
TC191119
TC191229
TC191626
TC191730
TC192194
TC192298
TC192457
TC192502
TC192669
TC192858
TC193222
TC193627
TC194526
TC194777
TC194892
TC194955
TC195319
TC195812
TC196789
TC197025
TC197026
TC197062
TC197441
TC197552
TC197864
TC198167
TC198186
TC198358
TC198422
TC198445
TC198561
TC198689
TC198742
TC198884
TC199193
TC199468
TC199907
TC200090
TC200132
TC200246
TC200295
TC200303
TC200868
TC201704
TC202226
TC202352
TC202569
TC203025
TC203250
TC203768
TC204196
TC204304
TC204579
TC204934
TC205003
TC205124
TC205129
TC205185
TC205524
TC205572
TC205840
TC205939
TC206096
TC206258
TC206334
TC206429
TC206648
TC206848
TC206905
TC206922
TC207108
TC207267
TC207299
TC207425
TC207432
TC207528
TC207735
TC207744
TC208129
TC208176
TC208270
TC208693
TC208780
TC209064
TC210008
TC210122
TC210169
TC210411
TC210711
TC210795
TC210816
TC210823
TC210858
TC211345
TC211644
TC212148
TC212154
TC212198
TC212347
TC212449
TC212607
TC212637
TC212962
TC213027
TC213077
TC213274
TC213355
TC214762
TC214785
TC214816
TC214837
TC214939
TC215349
TC215430
TC215543
TC215605
TC215896
TC215903
TC216231
TC216257
TC216269
TC216304
TC216486
TC216633
TC216959
TC217072
TC217105
TC217274
TC217395
TC217490
TC217539
TC217850

## Sheet: shared-Large&September
BX075536
CA367174
CA386821
CR370061
CR375357
CT567267
CU067656
CX030881
CX249048
FP324063
GE829185
GSONMT00017102001
GSONMT00020840001
GSONMT00022242001
GSONMT00023528001
GSONMT00023806001
GSONMT00032415001
GSONMT00039784001
GSONMT00058994001
GSONMT00062720001
GSONMT00069191001
GSONMT00069475001
GSONMT00071754001
GSONMT00080446001
NODE_39951_length_204_cov_2.500000
NODE_41431_length_323_cov_0.897833
SRR020739-17587
SRR020739-2611
SRR020739-6627
SRR020739-806
SRR020740-9137
TC172644
TC179875
TC182449
TC182739
TC185396
TC188413
TC188986
TC189022
TC189262
TC189498
TC190235
TC192671
TC193247
TC194884
TC199979
TC200080
TC203130
TC205186
TC206596
TC207263
TC208309
TC208516
TC209165
TC211067
TC211615
TC214901
TC216178
TC216754
TC217021

## Sheet: shared-Small&December
BX080725
BX081217
BX083160
BX308763
BX308934
BX311312
BX318166
BX318167
BX872003
BX877026
BX886792
CA379814
CR942966
CT570066
CT571544
CX038257
CX067717
CX718783
FP323846
GSONMT00011154001
GSONMT00018547001
GSONMT00026598001
GSONMT00028240001
GSONMT00032093001
GSONMT00041074001
GSONMT00041655001
GSONMT00055686001
GSONMT00057337001
GSONMT00063100001
GSONMT00072332001
GSONMT00074586001
GSONMT00074587001
GSONMT00076512001
GSONMT00077567001
GSONMT00078875001
GSONMT00080945001
NODE_42894_length_378_cov_2.785714
NODE_45926_length_604_cov_1.264901
NODE_55844_length_555_cov_1.021622
NODE_64351_length_230_cov_1.217391
NODE_65317_length_202_cov_1.000000
NODE_65681_length_233_cov_1.236052
SRR020739-12611
SRR020739-19342
SRR020739-21918
SRR020739-4477
SRR020740-10635
TC173369
TC176830
TC178698
TC180343
TC182447
TC182775
TC183290
TC183733
TC183926
TC184273
TC184450
TC185549
TC185700
TC197697
TC200412
TC206774
TC207707
TC209855
TC211440
TC211607
TC215068

## Sheet: shared-Small&September
BX072619
BX075836
BX076930
BX080187
BX082400
BX297586
BX297587
BX298061
BX298062
BX301766
BX302188
BX302192
BX303464
BX303727
BX304051
BX305118
BX306755
BX306958
BX307201
BX308802
BX309517
BX315100
BX318383
BX318999
BX321564
BX857131
BX857586
BX866986
BX867754
BX868075
BX871539
BX884839
BX912015
CA346092
CA347773
CA351204
CA353006
CA359319
CA359320
CA360291
CA365925
CA368892
CA374313
CA374501
CA376510
CA382511
CA388514
CB492205
CN210984
CR372212
CR372376
CR372882
CT566078
CT568953
CT569047
CT569112
CT569519
CT569774
CT569885
CT569972
CT570056
CT570155
CT570202
CT570215
CT570346
CT570393
CT570523
CT570880
CT570910
CT570967
CT571010
CT571063
CU063767
CU070311
CU071974
CX041487
CX140116
CX248791
CX260624
CX260625
CX717825
DV200584
DV202156
FP321057
FP322651
FP323009
GE825747
GE830392
GE835196
GE837285
GSONMT00000254001
GSONMT00000505001
GSONMT00002350001
GSONMT00005406001
GSONMT00006055001
GSONMT00006326001
GSONMT00007403001
GSONMT00007795001
GSONMT00007837001
GSONMT00008602001
GSONMT00008727001
GSONMT00011183001
GSONMT00012258001
GSONMT00012358001
GSONMT00014531001
GSONMT00015540001
GSONMT00016047001
GSONMT00016678001
GSONMT00017878001
GSONMT00018114001
GSONMT00019616001
GSONMT00021191001
GSONMT00022960001
GSONMT00023794001
GSONMT00025113001
GSONMT00026104001
GSONMT00026983001
GSONMT00028709001
GSONMT00029001001
GSONMT00029058001
GSONMT00029227001
GSONMT00032565001
GSONMT00032740001
GSONMT00035251001
GSONMT00037544001
GSONMT00041695001
GSONMT00042730001
GSONMT00044598001
GSONMT00046318001
GSONMT00046331001
GSONMT00048103001
GSONMT00048143001
GSONMT00048249001
GSONMT00048250001
GSONMT00048302001
GSONMT00049085001
GSONMT00049407001
GSONMT00050232001
GSONMT00050340001
GSONMT00050693001
GSONMT00051621001
GSONMT00052139001
GSONMT00053040001
GSONMT00053156001
GSONMT00053887001
GSONMT00055114001
GSONMT00056531001
GSONMT00056857001
GSONMT00057293001
GSONMT00057539001
GSONMT00057542001
GSONMT00057941001
GSONMT00058061001
GSONMT00059373001
GSONMT00060133001
GSONMT00060138001
GSONMT00061690001
GSONMT00062044001
GSONMT00062600001
GSONMT00063580001
GSONMT00064012001
GSONMT00064459001
GSONMT00067919001
GSONMT00067942001
GSONMT00068520001
GSONMT00068749001
GSONMT00068906001
GSONMT00069245001
GSONMT00071474001
GSONMT00071707001
GSONMT00071779001
GSONMT00071981001
GSONMT00072339001
GSONMT00072451001
GSONMT00074840001
GSONMT00076548001
GSONMT00076552001
GSONMT00076980001
GSONMT00077886001
GSONMT00077918001
GSONMT00078482001
GSONMT00079539001
GSONMT00080725001
GSONMT00081399001
GSONMT00081823001
NODE_16527_length_389_cov_3.894602
NODE_25812_length_205_cov_1.853659
NODE_28570_length_652_cov_1.019939
NODE_29106_length_312_cov_0.682692
NODE_37103_length_362_cov_2.723757
NODE_39256_length_350_cov_2.188571
NODE_39542_length_567_cov_2.582011
NODE_45313_length_258_cov_0.976744
NODE_45539_length_222_cov_1.684685
NODE_46332_length_217_cov_2.023041
NODE_47640_length_284_cov_1.996479
NODE_47877_length_509_cov_1.642436
NODE_50979_length_228_cov_1.140351
NODE_51313_length_222_cov_1.396396
NODE_55157_length_598_cov_0.690635
NODE_55336_length_435_cov_1.000000
NODE_55643_length_254_cov_1.133858
NODE_55838_length_598_cov_0.785953
NODE_56723_length_259_cov_1.193050
NODE_57735_length_215_cov_0.130233
NODE_57928_length_462_cov_0.841991
NODE_57945_length_447_cov_0.997763
NODE_60623_length_325_cov_2.000000
NODE_64578_length_230_cov_1.017391
NODE_64619_length_264_cov_1.295455
NODE_64639_length_287_cov_1.017422
NODE_66433_length_233_cov_1.042918
NODE_66622_length_209_cov_1.966507
NODE_67566_length_202_cov_1.049505
NODE_9072_length_723_cov_1.531120
SRR020739-10053
SRR020739-10798
SRR020739-11125
SRR020739-1135
SRR020739-11527
SRR020739-11865
SRR020739-12254
SRR020739-12343
SRR020739-12774
SRR020739-12918
SRR020739-12949
SRR020739-133
SRR020739-14090
SRR020739-14237
SRR020739-14436
SRR020739-1465
SRR020739-15424
SRR020739-15607
SRR020739-1565
SRR020739-17496
SRR020739-24943
SRR020739-2496
SRR020739-2648
SRR020739-27643
SRR020739-2939
SRR020739-29841
SRR020739-3070
SRR020739-31984
SRR020739-35516
SRR020739-389
SRR020739-418
SRR020739-428
SRR020739-4298
SRR020739-49
SRR020739-544
SRR020739-5651
SRR020739-5841
SRR020739-6142
SRR020739-6614
SRR020739-6680
SRR020739-6834
SRR020739-6949
SRR020739-7
SRR020739-7401
SRR020739-779
SRR020739-9390
SRR020739-9480
SRR020740-10523
SRR020740-1203
SRR020740-1205
SRR020740-12302
SRR020740-12932
SRR020740-1584
SRR020740-16714
SRR020740-16758
SRR020740-18090
SRR020740-18255
SRR020740-19616
SRR020740-1992
SRR020740-2058
SRR020740-2091
SRR020740-2408
SRR020740-2412
SRR020740-2427
SRR020740-2665
SRR020740-2794
SRR020740-325
SRR020740-3512
SRR020740-369
SRR020740-4044
SRR020740-41
SRR020740-4370
SRR020740-4925
SRR020740-5103
SRR020740-5212
SRR020740-5411
SRR020740-5539
SRR020740-5811
SRR020740-64
SRR020740-6589
SRR020740-6867
SRR020740-7196
SRR020740-7404
SRR020740-7874
SRR020740-8587
SRR020740-8900
SRR020740-9537
SRR020740-9653
SRR020740-9687
SRR020740-9926
TC172661
TC173375
TC173397
TC173457
TC173648
TC174544
TC174577
TC175010
TC175150
TC175578
TC176279
TC176294
TC177255
TC177460
TC177465
TC178298
TC178373
TC179461
TC179656
TC181545
TC182964
TC183132
TC183460
TC183610
TC183770
TC183903
TC184801
TC185052
TC186038
TC186043
TC186684
TC186691
TC186778
TC186988
TC187120
TC187282
TC187456
TC187651
TC187673
TC187757
TC187931
TC188202
TC188325
TC188448
TC188519
TC188585
TC188814
TC189472
TC189903
TC189982
TC190465
TC190607
TC190677
TC190869
TC190936
TC190995
TC191769
TC192356
TC192469
TC192787
TC193390
TC193391
TC193898
TC194117
TC194692
TC194772
TC194919
TC195068
TC196534
TC196539
TC196710
TC197000
TC197939
TC197945
TC199027
TC199045
TC199097
TC199436
TC199539
TC199546
TC199685
TC199793
TC199882
TC200245
TC201223
TC202661
TC203219
TC203895
TC204025
TC204119
TC204315
TC204434
TC204690
TC204965
TC205462
TC205563
TC205584
TC206050
TC206896
TC207414
TC208274
TC209087
TC209453
TC209602
TC209911
TC210155
TC210254
TC211198
TC211298
TC211316
TC211674
TC211679
TC211713
TC212021
TC212058
TC212136
TC212933
TC214795
TC215046
TC215076
TC215372
TC216068
TC216193
TC216582
TC216602
TC216718
TC217244
